# Supplementary material for: Green Finance, Environmental Regulations, and Green Technologies in China: Implications for Achieving Green Economic Recovery
Source: publisher site journal article supplement (doi:10.1515/econ-2022-0106), 2024-01-01
Supplement: Supplementary file 1 [file Reviews.pdf]

# Reviews of ECONJOURNAL-D-23-00158R1

Green finance, environmental regulations, and green technologies in China:  
Implications for achieving green economic recovery

## Round 1

### Reviewer 1

Green finance, environmental regulations, and green technologies in China:  
Implications for achieving green economic recover

Recommendation: Major Revision

Comments:

- 1) Starting of the abstract should be problem oriented and how this study is going to address the specific problem. Please change it accordingly.
- 2) Significance should highlight more in introduction.
- 3) Literature review must be organized and must be enrich more by incorporating these important studies: "Quantile-based assessment of energy-CO2 emission nexus in Pakistan", "Economic policy uncertainty and green growth in IEA member countries: A role of environmental stringency policy", "Safe-haven properties of green bonds for industrial sectors (GICS) in the United States: Evidence from Covid-19 pandemic and Global Financial Crisis", "The role of shadow economy to determine CO2 emission in Pakistan: evidence from novel dynamic simulated ARDL model and wavelet coherence analysis", "A validity of environmental Kuznets curve under the role of urbanization, financial development index and foreign direct investment in Pakistan", "An aggregate and disaggregate energy consumption, industrial growth and CO2 emission: Fresh evidence from structural breaks and combined cointegration for" etc .
- 4) How mode; has been created, as per section 3.1? Theoretical reasoning behind model building is missing.
- 5) Reasoning for selecting sample period is missing, must be added in data section.
- 6) Moreover, as this study considers panel analysis, and did not discuss about panel. Which panel this study has taken? Reasoning for selecting panel is missing, must be added in data section.
- 7) Please add a table explaining about variables' name, symbol, their complete measurement and definitions in data section.
- 8) As author has taken natural log of all series, descriptive statistic table should provide base on natural log series instead of original series.
- 9) Refer to table 5, please add note that explains the meaning of \*, \*\* etc for all tables.

10) I suggest author to follow general format of research, methodology section should add all equations and reasoning for opting approaches, results' tables should be added into section 4 and discuss there.

11) Reduce the length of conclusion section, it must reflects conclusion instead of discussion.

## Reviewer 2

This is a very robust paper and the authors deserve the opportunity to have it considered for publication in a reputable journal such as this. However, the authors need to look at (a) the construction of the abstract and should follow the sequence properly. (b) Some spellings corrections have been made in the manuscript (c) there are many acronyms to explain, (d) it is CO<sub>2</sub> and not CO2 These will improve the quality of the paper.

- Where is the first generation before the second
- A good abstract is written in the following order: a general statement, an objective the main variables used, the methodology adopted, key results and the recommendations in that order. This should be followed in this case.
- Redundant statement
- Re-number
- Indicate the level of significance
- Give meanings of the acronyms.
